# Supplementary material
Source: publisher figshare collection journal article supplement (https://acs.figshare.com/ndownloader/files/12323396)
Supplement: Supplementary file 1 [file 12323396]

## Supporting information

### Putting Nano Armors on Yolk-Shell Si@C Nanoparticles: A Reliable Engineering Way to Build Better Si-based Anodes for Li-Ion Batteries

Jian Jiang<sup>†a,c,\*</sup>, Han Zhang<sup>†a,c</sup>, Jianhui Zhu<sup>b</sup>, Linpo Li<sup>a,c</sup>, Yani Liu<sup>a,c</sup>, Ting Meng<sup>a,c</sup>, Lai Ma<sup>a,c</sup>, Maowen Xu,<sup>a,c</sup>  
Jinping Liu,<sup>d,\*</sup> Chang Ming Li<sup>a,c,\*</sup>

<sup>a</sup>Institute for Clean Energy & Advanced Materials, Faculty of Materials and Energy, Southwest University, Chongqing 400715, P.R. China.

<sup>b</sup>School of Physical Science and Technology, Southwest University, No. 2 Tiansheng Road, BeiBei District, Chongqing 400715, P.R. China.

<sup>c</sup>Chongqing Key Laboratory for Advanced Materials and Technologies of Clean Energies, Chongqing 400715, P.R. China.

<sup>d</sup>School of Chemistry, Chemical Engineering and Life Sciences, Wuhan University of Technology, Wuhan, Hubei 430070, China.

To whom correspondence should be addressed: Fax: +86-23-68254969. Tel: +86-23-68254842.

\* E-mail: [jjiang@swu.edu.cn](mailto:jjiang@swu.edu.cn) (J. Jiang); \* E-mail: [liujp@whut.edu.cn](mailto:liujp@whut.edu.cn) (J. P. Liu); \* E-mail: [ecmli@swu.edu.cn](mailto:ecmli@swu.edu.cn) (C. M. Li)

<sup>†</sup>J. Jiang and H. Zhang contributed equally to this work.

**Page S-1: Front Cover.**

**Page S-2: Figure S1. Raman spectrum of Y-S Si@C⊂Ni electrode samples.**

**Figure S2. TG curve of hybrid powder samples (after acid wash) in air atmospheres.**

**Page S-3: Figure S3. The cyclic CE plot of Y-S Si@C⊂Ni, Y-S Si@C and bare Si electrodes.**

**Figure S4. EIS plots of distinct anodes before and after 600 cycles.**

**Page S-4: Figure S5. Additional SEM observations of Si@C⊂Ni electrode after 600 cycles.**

**Figure S6. SEM observations of Si@C hybrid electrodes after 600 cycles.**

**Page S-5: Figure S7. TEM image of Si@C⊂Ni electrode after 600 cycles.**

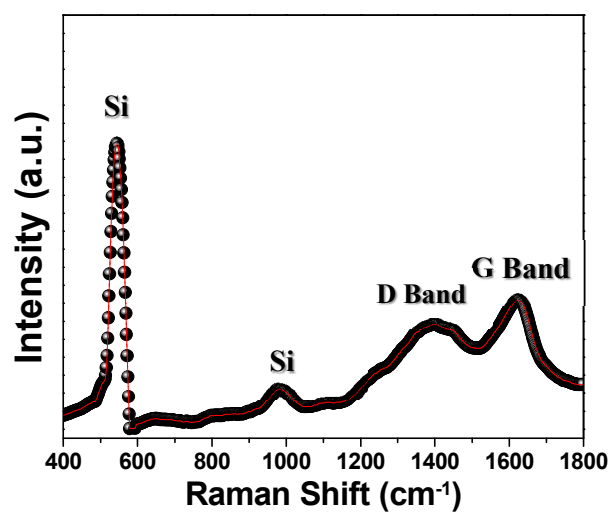

**Figure S1.** Raman spectrum of Si@C⊆Ni hybrid products.

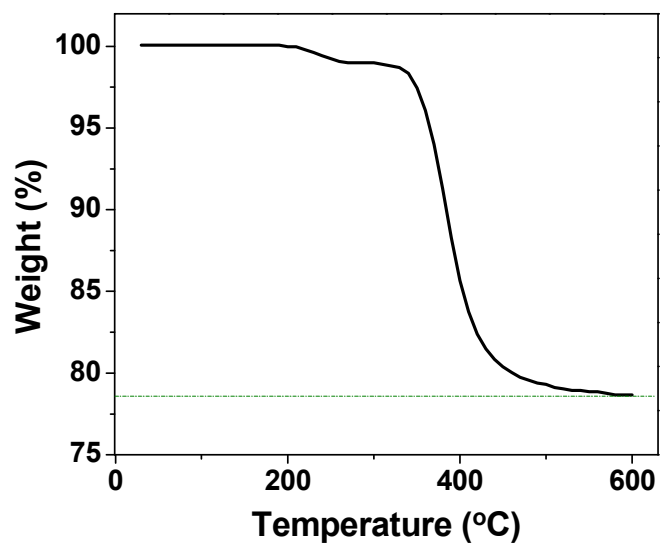

**Figure S2.** TG curve of hybrid powder samples (after acid wash) in air atmospheres.

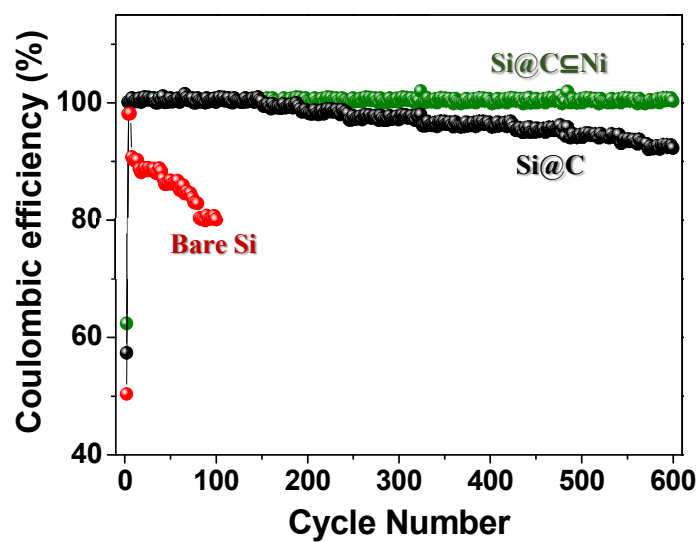

**Figure S3.** The cyclic CE of Y-S Si@C⊃Ni, Y-S Si@C and bare Si electrodes.

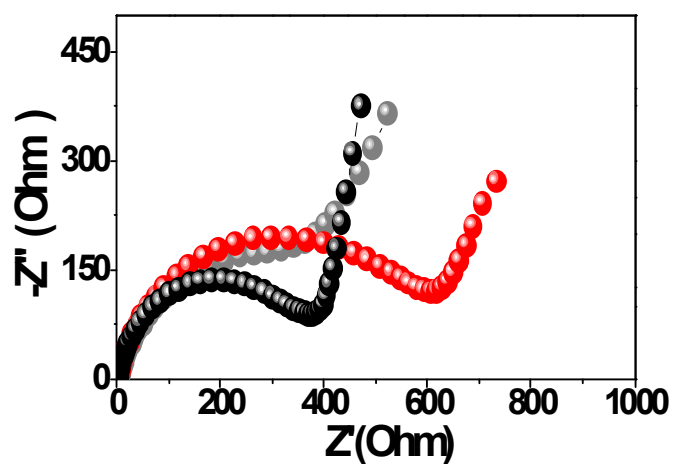

**Figure S4.** EIS plots of distinct anodes (black: Si@C⊃Ni; gray: Si@C; red: pure Si nanoparticles) before and after 600 cycles.

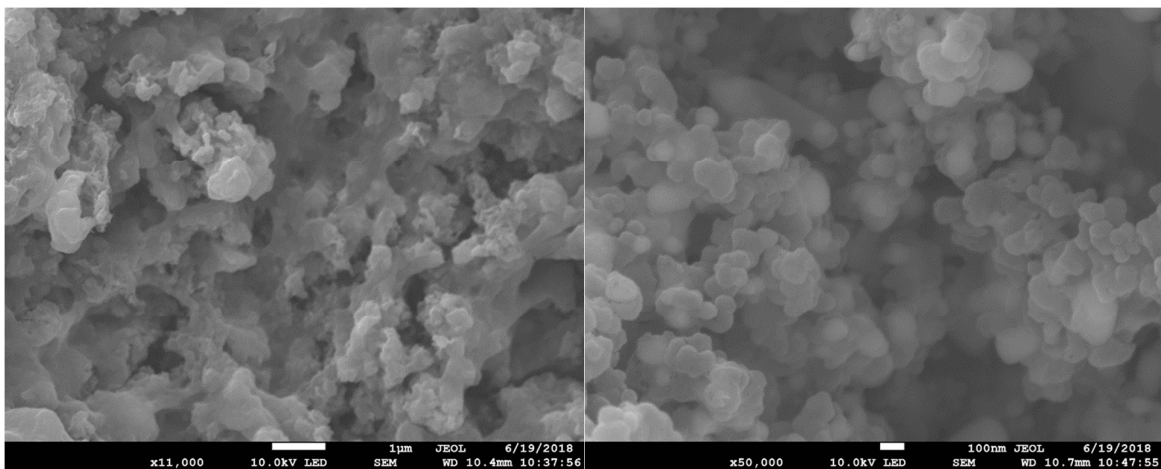

**Figure S5.** Additional SEM images of Si@C⊂Ni electrode after 600 cycles.

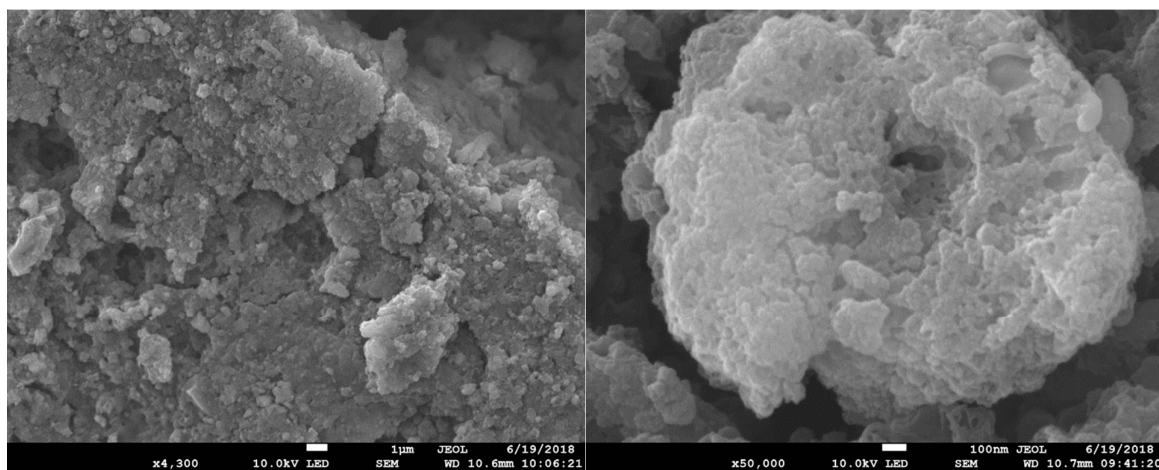

**Figure S6.** SEM observations of Si@C hybrid electrodes after 600 cycles.

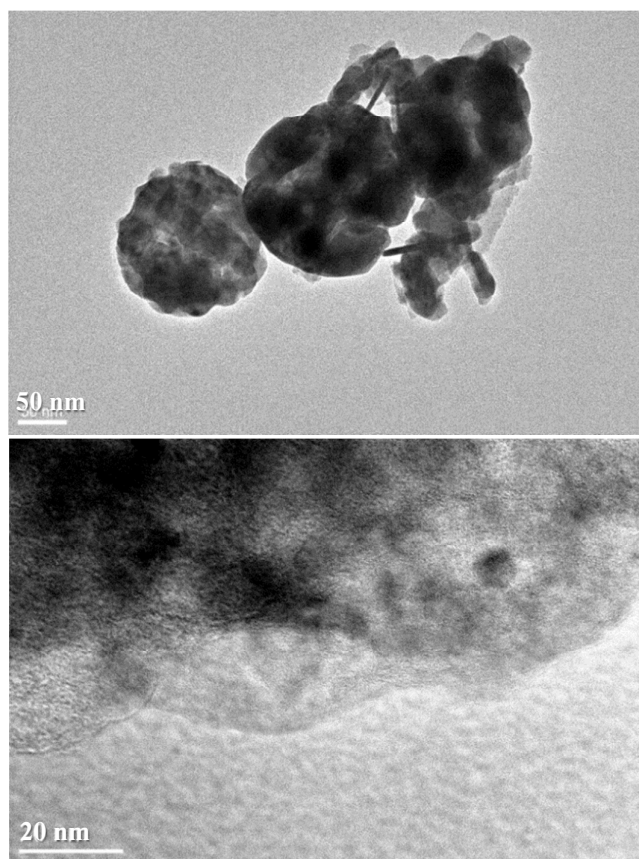

**Figure S7.** TEM observations on cycled Y-S Si@C/Ni anodes after 600 cycles.
